# Supplementary material for: Breadth of Coverage, Ease of Use, and Quality of Mobile Point-of-Care Tool Information Summaries: An Evaluation
Source: PubMed Central journal article supplement (PMC5081478; doi:10.2196/mhealth.6189), 2016-10-12
Supplement: mhealth_v4i4e117_app1.pdf [file mhealth_v4i4e117_app1.pdf]

## Appendix 1: ICD-9 Codes Used to Study Breadth of Coverage of POCT

| ICD-9 Code | Diagnosis                                                                        |
|------------|----------------------------------------------------------------------------------|
| 38.90      | Septicemia, unspecified                                                          |
| 410.71     | Subendocardial infarction, initial episode of care                               |
| 434.91     | Cerebral artery occlusion, unspecified with cerebral infarction                  |
| 584.90     | Acute kidney failure, unspecified                                                |
| 491.21     | Obstructive Chronic bronchitis with acute exacerbation                           |
| 715.36     | Osteoarthritis, localized, not specified whether primary or secondary, lower leg |
| 428.33     | Acute on chronic diastolic heart failure                                         |
| 518.81     | Acute respiratory failure                                                        |
| 486.00     | Pneumonia, organism not specified                                                |
| 427.31     | Atrial fibrillation                                                              |
| 272.40     | Other and unspecified hyperlipidemia                                             |
| 401.90     | Unspecified Hypertension                                                         |
| 250.00     | Diabetes mellitus Type II without complications not stated uncontrolled          |
| 327.23     | Obstructive sleep apnea                                                          |
| 244.90     | Unspecified acquired Hypothyroidism                                              |
| 599.00     | Urinary tract infection, site not specified                                      |
| 724.20     | Lumbago                                                                          |
