# Supplementary material for: Breadth of Coverage, Ease of Use, and Quality of Mobile Point-of-Care Tool Information Summaries: An Evaluation
Source: PubMed Central journal article supplement (PMC5081478; doi:10.2196/mhealth.6189), 2016-10-12
Supplement: mhealth_v4i4e117_app2.pdf [file mhealth_v4i4e117_app2.pdf]

## Appendix 2: Breadth of Coverage Criteria & Definitions

| Breadth of Coverage Criteria         | Definition                                                                                                  | Score    |           |
|--------------------------------------|-------------------------------------------------------------------------------------------------------------|----------|-----------|
| POCT provides a summary of the topic | Topic summary should define the most important items of information a physician would need for patient care | Absent 0 | Present 1 |
| Etiology                             | The science and study of the causes of disease and their mode of operation                                  | Absent 0 | Present 1 |
| Patho-physiology                     | Derangement of function seen in disease                                                                     | Absent 0 | Present 1 |
| Clinical Manifestations              | The display or disclosure of characteristic signs or symptoms of an illness.                                | Absent 0 | Present 1 |
| Diagnosis                            | Determination of the nature of a disease, injury or congenital defect                                       | Absent 0 | Present 1 |
| Treatment/Therapy                    | The treatment of disease or disorder by any method                                                          | Absent 0 | Present 1 |
| Prognosis                            | The forecast of the probably course and/or outcome of a disease.                                            | Absent 0 | Present 1 |

Definitions Source: Stedman's Medical Dictionary
