# Supplementary material for: Breadth of Coverage, Ease of Use, and Quality of Mobile Point-of-Care Tool Information Summaries: An Evaluation
Source: PubMed Central journal article supplement (PMC5081478; doi:10.2196/mhealth.6189), 2016-10-12
Supplement: mhealth_v4i4e117_app3.pdf [file mhealth_v4i4e117_app3.pdf]

### Appendix 3: Quality Measures & Definitions

| Quality Measure                                  | Definition                                                                          | Score    |           |
|--------------------------------------------------|-------------------------------------------------------------------------------------|----------|-----------|
| Inline references for treatment recommendations  | References provided in-text, directly supporting individual statements within topic | Absent 0 | Present 1 |
| Inline references for diagnostic recommendations | References provided in-text, directly supporting individual statements within topic | Absent 0 | Present 1 |
| Date of stamping of individual content           | Date of update provided at start or end of content provided                         | Absent 0 | Present 1 |
| Date of stamping for application platform        | Date of update provided in footer of mobile app or in "About" content               | Absent 0 | Present 1 |
