# Supplementary material for: Breadth of Coverage, Ease of Use, and Quality of Mobile Point-of-Care Tool Information Summaries: An Evaluation
Source: PubMed Central journal article supplement (PMC5081478; doi:10.2196/mhealth.6189), 2016-10-12
Supplement: mhealth_v4i4e117_app4.pdf [file mhealth_v4i4e117_app4.pdf]

## Appendix 4: Ease of Use Factors & Definitions

| Ease of Use Factor                                                                                  | Definition                                                                                  | Score    |           |
|-----------------------------------------------------------------------------------------------------|---------------------------------------------------------------------------------------------|----------|-----------|
| Search within summary content                                                                       | User can search within topic to find information                                            | Absent 0 | Present 1 |
| Table of Contents within topic                                                                      | Topic contains appropriate Table of Contents for easy navigation                            | Absent 0 | Present 1 |
| Topic is displayed in format determined by best practices in mobile application design (Scrolling)  | Appropriate scrolling patterns are utilized within the topic                                | Absent 0 | Present 1 |
| Topic is displayed in format determined by best practices in mobile application design (Affordance) | Making it clear what can be selected, tapped or swiped.                                     | Absent 0 | Present 1 |
| Connectivity to internet                                                                            | Mobile POCT need for Wi-Fi or mobile data connection for access to content                  | Yes 0    | No 1      |
| Personal account is easy to log into to access content                                              | If personal account is required, they are easy to log into and modify settings for the POCT | Absent 0 | Present 1 |
