# Supplementary material for: Breadth of Coverage, Ease of Use, and Quality of Mobile Point-of-Care Tool Information Summaries: An Evaluation
Source: PubMed Central journal article supplement (PMC5081478; doi:10.2196/mhealth.6189), 2016-10-12
Supplement: mhealth_v4i4e117_app5.pdf [file mhealth_v4i4e117_app5.pdf]

Multimedia Appendix 5: Calculation of General Linear Regression Model for the Breadth of Coverage, Ease of Use, and the Quality Measures for the comparison on the Mobile Point of Care Tools

Breadth of Coverage Measurement Score Rank

| Tool                    | Score Rank |
|-------------------------|------------|
| DynaMed                 | 87.19      |
| DynaMedPlus             | 260.35     |
| Epocrates               | 132.35     |
| Essential Evidence Plus | 249.18     |
| Medscape                | 277.65     |
| UpToDate                | 220.28     |

Breadth of Coverage Least Squares Means for Effect Measures

|                         | DynaMed | DynaMedPlus | Epocrates | Essential Evidence Plus | Medscape | UpToDate |
|-------------------------|---------|-------------|-----------|-------------------------|----------|----------|
| DynaMed                 |         | <.0001      | 0.0026    | <.0001                  | <.0001   | <.0001   |
| DynaMedPlus             | <.0001  |             | <.0001    | 1                       | 1        | 0.0126   |
| Epocrates               | 0.0026  | <.0001      |           | <.0001                  | <.0001   | <.0001   |
| Essential Evidence Plus | <.0001  | 1           | <.0001    |                         | 0.2591   | 0.2352   |
| Medscape                | <.0001  | 1           | <.0001    | 0.2591                  |          | <.0001   |
| UpToDate                | <.0001  | 0.0126      | <.0001    | 0.2352                  | <.0001   |          |

Ease of Use Measurement Score Rank

| Tool                    | Score Rank |
|-------------------------|------------|
| DynaMed                 | 13.0       |
| DynaMedPlus             | 22.5       |
| Epocrates               | 13.0       |
| Essential Evidence Plus | 3.0        |
| Medscape                | 10.5       |
| UpToDate                | 13.0       |

Ease of Use Least Squares Means for Effect Measures

|                         | DynaMed | DynaMedPlus | Epocrates | Essential Evidence Plus | Medscape | UpToDate |
|-------------------------|---------|-------------|-----------|-------------------------|----------|----------|
| DynaMed                 |         | 0.0001      | 1         | <.0001                  | 1        | 1        |
| DynaMedPlus             | 0.0001  |             | 0.0001    | <.0001                  | <.0001   | 0.0001   |
| Epocrates               | 1       | 0.0001      |           | <.0001                  | 1        | 1        |
| Essential Evidence Plus | <.0001  | <.0001      | <.0001    |                         | 0.0016   | <.0001   |
| Medscape                | 1       | <.0001      | 1         | 0.0016                  |          | 1        |
| UpToDate                | 1       | 0.0001      | 1         | <.0001                  | 1        |          |

Quality Measurement Score Rank

| Tool                    | Score Rank |
|-------------------------|------------|
| DynaMed                 | 14.5       |
| DynaMedPlus             | 14.5       |
| Epocrates               | 14.5       |
| Essential Evidence Plus | 14.5       |
| Medscape                | 2.5        |
| UpToDate                | 14.5       |

Quality Least Squares Means for Effect Measures

|                         | DynaMed | DynaMedPlus | Epocrates | Essential Evidence Plus | Medscape | UpToDate |
|-------------------------|---------|-------------|-----------|-------------------------|----------|----------|
| DynaMed                 |         |             |           |                         | <.0001   |          |
| DynaMedPlus             |         |             |           |                         | <.0001   |          |
| Epocrates               |         |             |           |                         | <.0001   |          |
| Essential Evidence Plus |         |             |           |                         | <.0001   |          |
| Medscape                | <.0001  | <.0001      | <.0001    | <.0001                  |          | <.0001   |
| UpToDate                |         |             |           |                         | <.0001   |          |
